# Supplementary material
Source: Royal Society of Chemistry journal article supplement (doi:10.1039/d6cc02555b)
Supplement: d6cc02555b1.pdf [file d6cc02555b1.pdf]

## Supporting Information

### **A multifunctional Cu@g-C<sub>3</sub>N<sub>4</sub> interfacial coating with synergistic desolvation promotion and interfacial pH stabilization for aqueous zinc-ion batteries**

*Jicheng Yan,<sup>a</sup> Zhongti Sun,<sup>\*b</sup> Changwei Dai,<sup>a</sup> Jiaxu Wang,<sup>a</sup> Benhua Wang,<sup>a</sup> Wuzhu Sun,<sup>a</sup> Chao*

*Li<sup>\*a</sup> and Jingyu Sun<sup>\*c</sup>*

- a. Discipline and Technology Center for High Temperature Functional Ceramics, Shandong Key Laboratory of Functional-Structural Integrated Ceramics, School of Materials Science and Engineering, Shandong University of Technology, Zibo, 255000, China. Email: chaol@sdut.edu.cn
- b. School of Materials Science and Engineering, Jiangsu University, Zhenjiang, 212013, Jiangsu, China. Email: ztsun@ujs.edu.cn
- c. College of Energy, Soochow University, Suzhou 215006, China. Email: sunjy86@suda.edu.cn

## Materials

Vanadium pentoxide ( $V_2O_5$ ), zinc sulfate heptahydrate ( $ZnSO_4 \cdot 7H_2O$ ), *N*-methyl-2-pyrrolidone (NMP), poly(vinylidene fluoride) (PVDF), and urea were purchased from Aladdin Reagent (Shanghai, China). Potassium chloride (KCl) was purchased from Macklin Biochemical (Shanghai, China). Glass fiber separators (GF/A) were purchased from Whatman. Hydrogen peroxide ( $H_2O_2$ , 30 wt%), ethanol ( $C_2H_5OH$ ), and copper (II) chloride ( $CuCl_2$ ) were purchased from Sinopharm Chemical Reagent (Shanghai, China). All reagents were used as received without further purification.

## Synthesis of Cu@g-C<sub>3</sub>N<sub>4</sub>

10 g of urea was dissolved in 15 mL of deionized water, followed by the addition of 67 mg of  $CuCl_2$ . The mixture was stirred at 90 °C until complete water evaporation, and the resulting solid was dried at 60 °C under vacuum for 12 h. The dried powder was ground for 30 min to obtain a homogeneous mixture, which was subsequently calcined at 550 °C for 3 h under a heating rate of 5 °C min<sup>-1</sup>.

## Preparation of Cu@g-C<sub>3</sub>N<sub>4</sub>@Zn anodes

Cu@g-C<sub>3</sub>N<sub>4</sub> and PVDF were dispersed in *N*-methyl-2-pyrrolidone (NMP) at a mass ratio of 9:1 to form a homogeneous slurry, which was then coated onto zinc foil using the doctor blade method. After drying at 80 °C under vacuum overnight, the Cu@g-C<sub>3</sub>N<sub>4</sub>@Zn electrodes were obtained.

## Synthesis of KVOH

The KVOH cathode material was synthesized following a previously reported procedure. Briefly, 0.364 g of  $V_2O_5$  was dissolved in 50 mL of deionized water with the addition of 2 mL of 30 wt%  $H_2O_2$ . Separately, 0.0745 g of KCl (molar ratio K:V = 1:4) was dissolved in 30 mL of deionized water. The two solutions were combined and stirred magnetically for 30 min, then transferred into a 100 mL Teflon-lined

stainless-steel autoclave and heated at 120 °C for 6 h. The resulting precipitate was collected by filtration, washed three times with deionized water and ethanol, and dried at 60 °C for 10 h, yielding a green powder.

### **Material characterization**

Sample morphology was examined by scanning electron microscopy (SEM, FEI Quanta 250) and transmission electron microscopy (TEM, FEI Tecnai G2 F20 S-TWIN). Atomic-resolution imaging was performed using aberration-corrected high-angle annular dark-field scanning transmission electron microscopy (HAADF-STEM, Thermo Scientific Themis Z). X-ray powder diffraction (XRD) patterns were collected on a Bruker D8 Advance diffractometer using Cu K $\alpha$  radiation. X-ray photoelectron spectroscopy (XPS) was performed on a Thermo Scientific ESCALAB 250Xi instrument. Cu loading was quantified by inductively coupled plasma optical emission spectrometry (ICP-OES, Thermo Fisher iCAP PRO).

### **Electrochemical measurements**

All CR2032-type coin cells were assembled under ambient conditions using glass fiber (GF/A, Whatman) as the separator with 90  $\mu$ L of electrolyte. The KVOH cathode was prepared by casting a slurry of active material, conductive carbon (Super P), and PVDF binder in a mass ratio of 7:2:1 onto carbon paper, followed by drying at 80 °C under vacuum for 12 h. The active material mass loading was approximately 1.2 mg cm<sup>-2</sup>. Galvanostatic charge–discharge measurements were performed on a NEWARE battery testing system at 25 °C.

Electrochemical measurements including linear sweep voltammetry (LSV), cyclic voltammetry (CV), Tafel polarization, electrochemical impedance spectroscopy (EIS), and chronoamperometry (CA) were conducted on a CHI 660E electrochemical workstation. CV of Zn//Ti asymmetric cells were performed in the voltage range of -0.4 to 0.6 V at a scan rate of 1 mV s<sup>-1</sup>, with Zn foil serving as both the counter and

reference electrode. For Zn//KVOH full cells, CV was recorded in the range of 0.2–1.6 V at 0.1 mV s<sup>-1</sup>. CA curves were recorded at a constant overpotential of –150 mV for 800 s. EIS was performed over a frequency range of 0.01 Hz to 100 kHz with an AC amplitude of 10 mV. HER activity was evaluated by LSV in a three-electrode configuration, with Zn foil, Pt plate, and Ag/AgCl as the working, counter, and reference electrodes, respectively, over the potential range of –0.95 to –2.0 V vs. Ag/AgCl at a scan rate of 1 mV s<sup>-1</sup>. Corrosion behavior was assessed by Tafel polarization in a three-electrode configuration, with Zn foil as the working and counter electrode, and Ag/AgCl as the reference electrodes in 2 M ZnSO<sub>4</sub> solution at 1 mV s<sup>-1</sup>.

### Theoretical calculations

All the calculations were performed by the spin-unrestricted density functional theory, executed by the Vienna Ab-initio Simulation Package with the projector augmented wave pseudopotential.<sup>1</sup> The electronic exchange-correlation interactions were treated by the GGA-PBE functional.<sup>2</sup> To accurately evaluate the interaction of Zn ion on the various substrates, the DFT-D3 correction scheme by the Grimme et al. was adopted.<sup>3</sup> The kinetic energy cutoff with the plane wave basis set was 400 eV. The integrated Brillouin zone was sampled by the mesh size of 3×3×1 and 5×5×1 for the geometric optimizations and static calculations, respectively. The total energy and residual force per atom were converged by the respective standard of 10<sup>-4</sup> eV and 0.02 eV/Å. The uptake of Zn on Cu@g-C<sub>3</sub>N<sub>4</sub>, g-C<sub>3</sub>N<sub>4</sub>, and graphene surface was considered. Cu@g-C<sub>3</sub>N<sub>4</sub> was marked by the Cu atom anchored into the graphitized g-C<sub>3</sub>N<sub>4</sub> supercell with 2×2 size, compared with the bare g-C<sub>3</sub>N<sub>4</sub> and bare-graphene with 5×5 supercell. The adsorption energy of Zn was calculated by the following formula:

$$E_{\text{ads}} = E_{\text{total}} - E_{\text{surf}} - E_{\text{Zn}}.$$

Where  $E_{\text{total}}$  and  $E_{\text{surf}}$  represent the total energy of substrates with and without Zn atom, respectively.  $E_{\text{Zn}}$  marks the atomic energy of Zn.

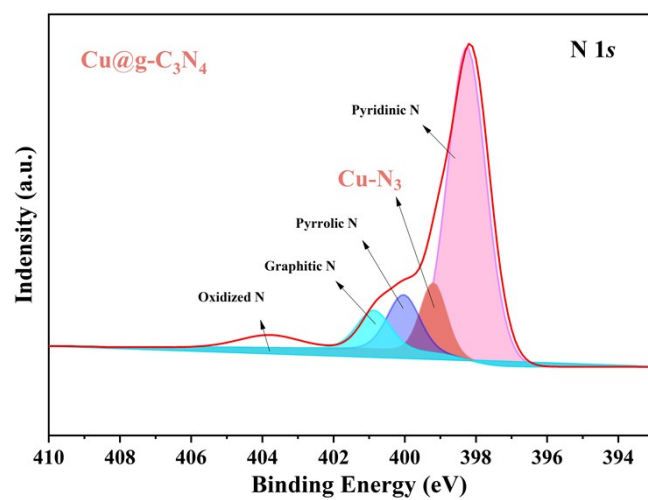

**Fig. S1** High-resolution N 1s XPS spectrum of Cu@g-C<sub>3</sub>N<sub>4</sub>.

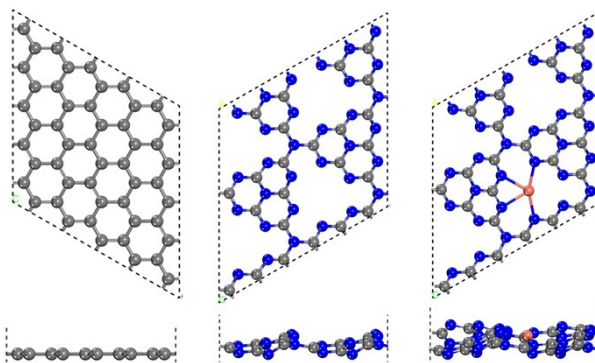

**Fig. S2** Optimized structural models of graphene, pristine g-C<sub>3</sub>N<sub>4</sub>, and Cu@g-C<sub>3</sub>N<sub>4</sub> used for DFT calculations (Cu, orange; N, blue; C, grey).

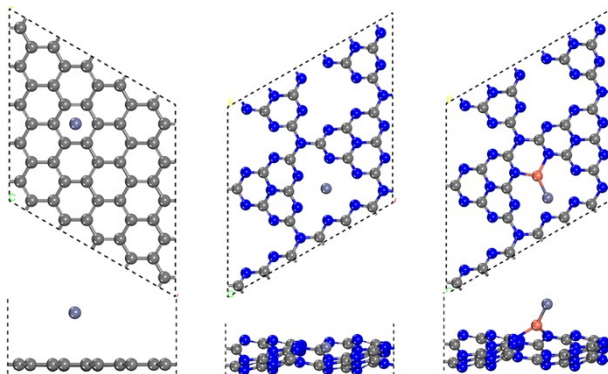

**Fig. S3** Optimized adsorption configuration of Zn on the (a) graphene, (b) g-C<sub>3</sub>N<sub>4</sub>, (c) Cu@g-C<sub>3</sub>N<sub>4</sub> substrate. The orange, brown, blue, and grey ball marks Cu, Zn, N and C atom, respectively.

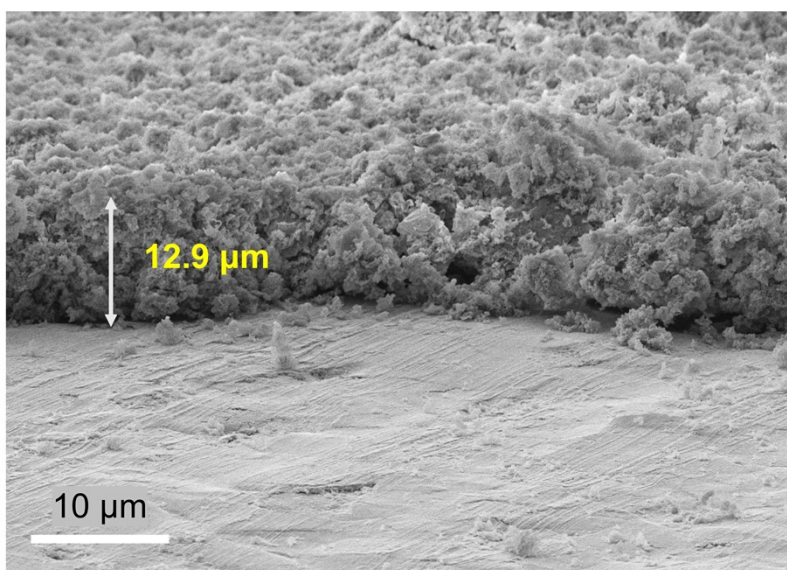

**Fig. S4** Cross-sectional SEM image of the Cu@g-C<sub>3</sub>N<sub>4</sub> coating on Zn foil.

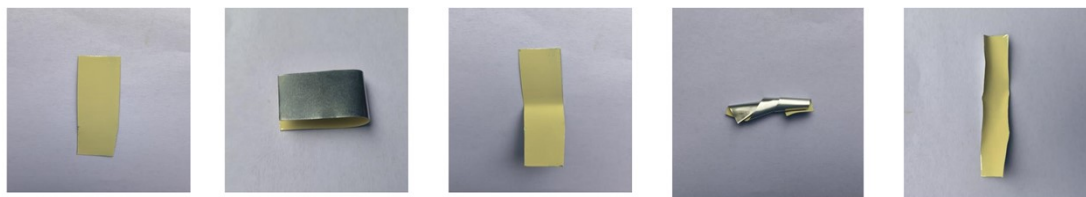

**Fig. S5** Photographs of Cu@g-C<sub>3</sub>N<sub>4</sub>@Zn under bending and twisting tests, demonstrating the mechanical flexibility and interfacial adhesion of the coating.

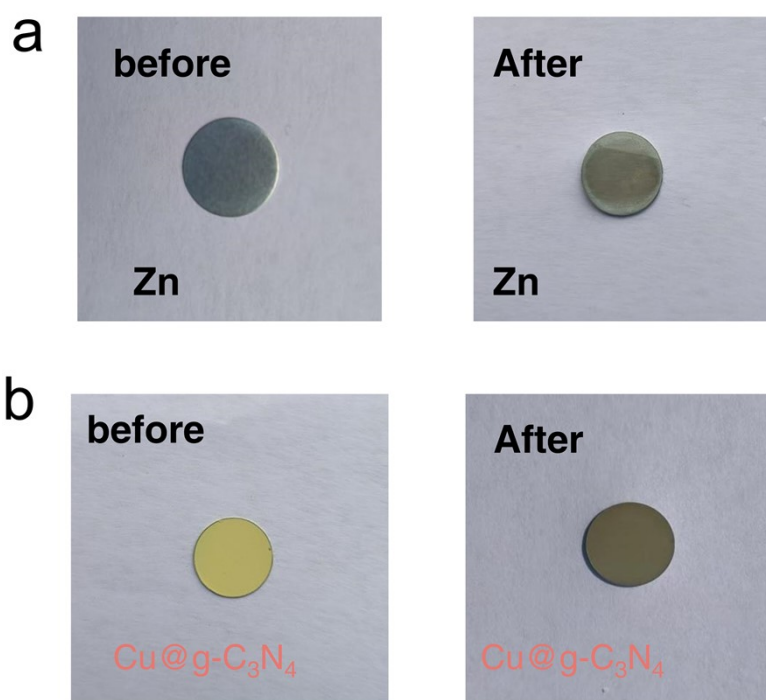

**Fig. S6.** Optical photographs of (a) bare Zn and (b) Cu@g-C<sub>3</sub>N<sub>4</sub>@Zn before and after immersion in 2 M ZnSO<sub>4</sub> for 7 days.

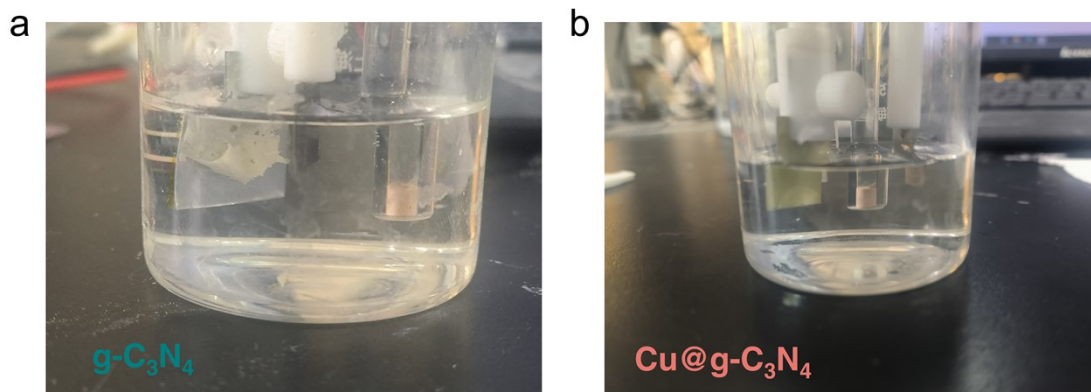

**Fig. S7.** Photographs of (a)  $g\text{-C}_3\text{N}_4@Zn$  and (b)  $Cu@g\text{-C}_3\text{N}_4@Zn$  electrodes after LSV testing, showing the improved structural integrity of the  $Cu@g\text{-C}_3\text{N}_4$  coating.

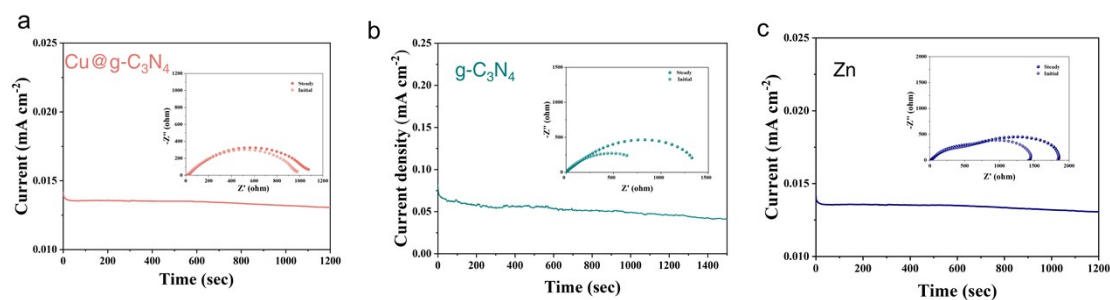

**Fig. S8.** Chronoamperometric current–time curves and Nyquist plots before and after polarization for  $Zn^{2+}$  transference number measurements of (a)  $Cu@g\text{-C}_3\text{N}_4@Zn$ , (b)  $g\text{-C}_3\text{N}_4@Zn$ , and (c) bare Zn symmetric cells.

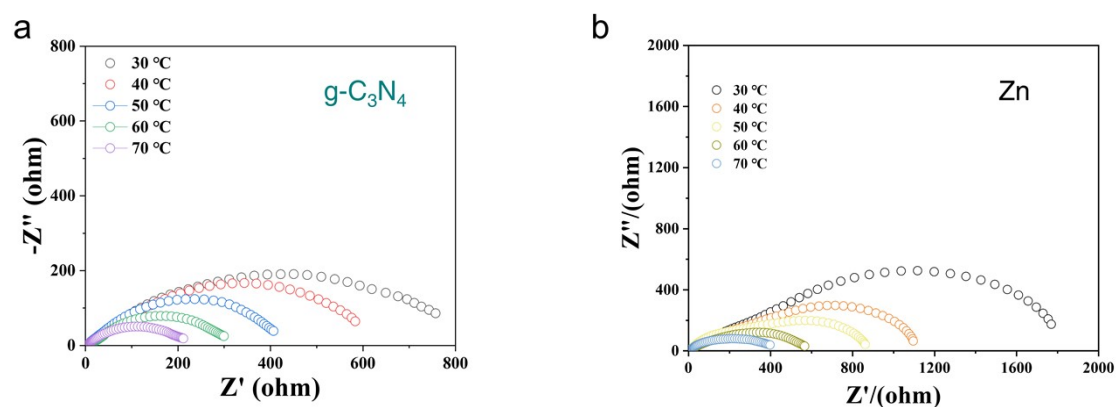

**Fig. S9** Temperature-dependent EIS Nyquist plots of (a)  $g\text{-C}_3\text{N}_4@Zn$  and (b) bare Zn symmetric cells measured from 30 to 70 °C.

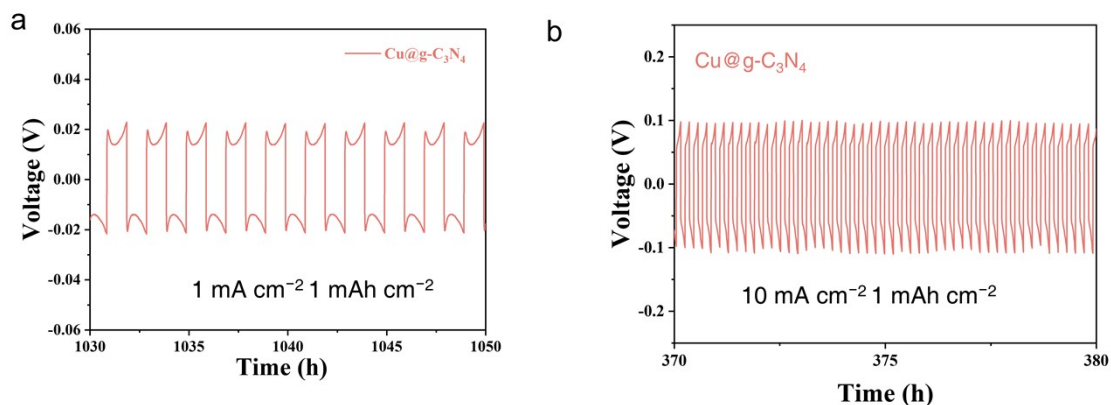

**Fig. S10** Enlarged voltage profiles of Cu@g-C<sub>3</sub>N<sub>4</sub>@Zn symmetric cells at (a) 1 mA cm<sup>-2</sup>/1 mAh cm<sup>-2</sup> and (b) 10 mA cm<sup>-2</sup>/1 mAh cm<sup>-2</sup>.

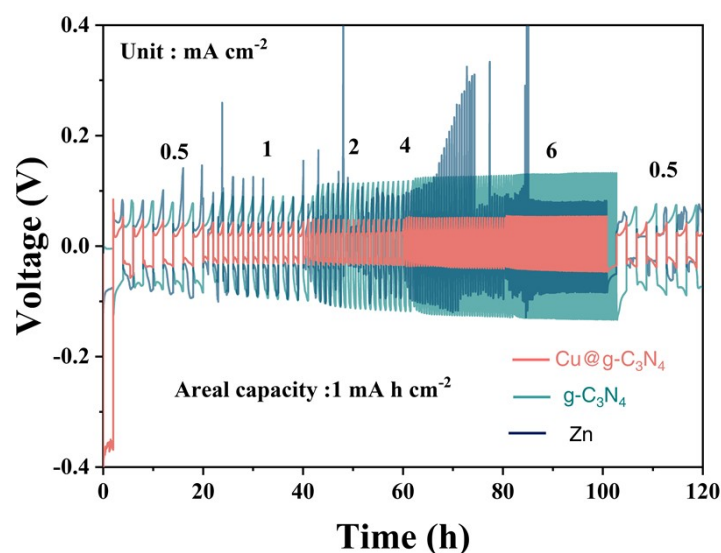

**Fig. S11** Rate performance of bare Zn, g-C<sub>3</sub>N<sub>4</sub>@Zn, and Cu@g-C<sub>3</sub>N<sub>4</sub>@Zn symmetric cells at current densities from 0.5 to 6 mA cm<sup>-2</sup> with an areal capacity of 1 mAh cm<sup>-2</sup>.

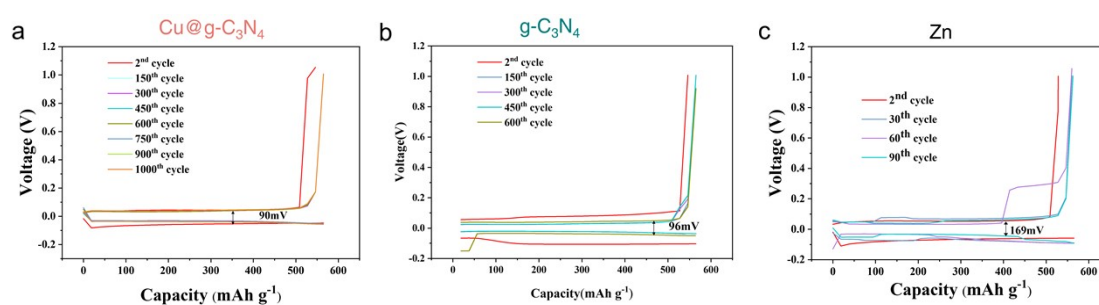

**Fig. S12** Voltage-capacity profiles of Zn//Cu cells corresponding to the coulombic-efficiency tests for (a) Cu@g-C<sub>3</sub>N<sub>4</sub>, (b) g-C<sub>3</sub>N<sub>4</sub>, and (c) bare Zn interfaces.

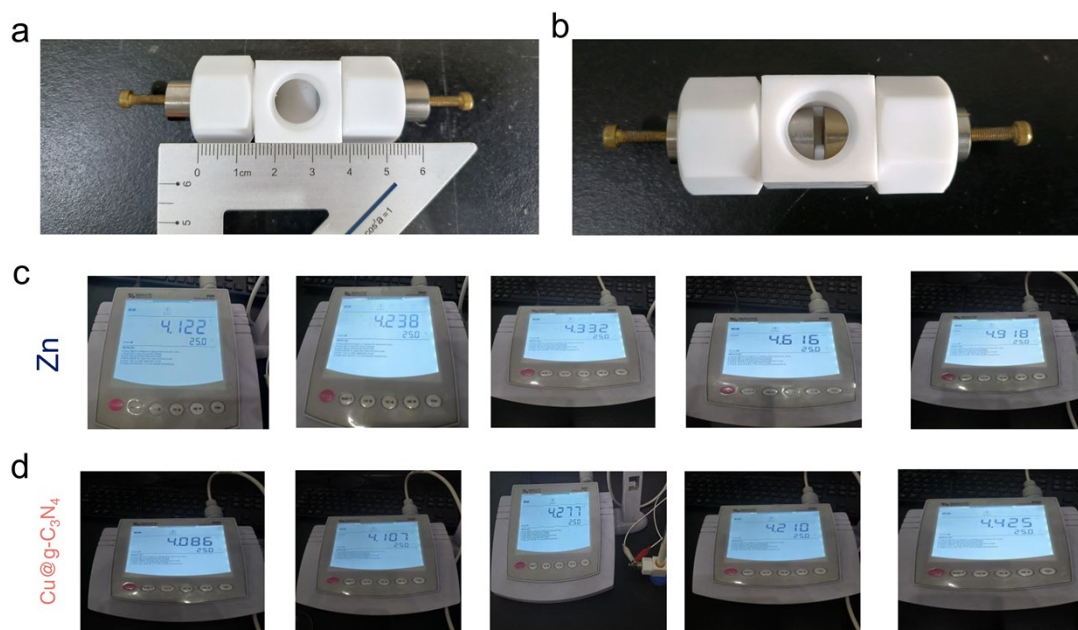

**Fig. S13** Photographs of the customized Swagelok-type in-situ pH monitoring device and representative pH readings for bare Zn and Cu@g-C<sub>3</sub>N<sub>4</sub>@Zn symmetric cells.

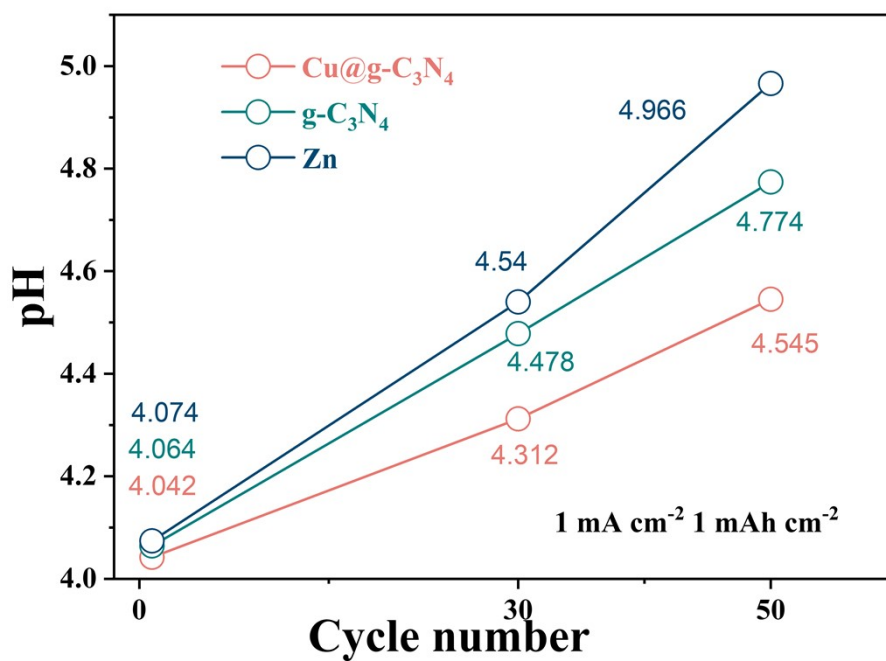

**Fig. S14** pH evolution of bare Zn, g-C<sub>3</sub>N<sub>4</sub>@Zn, and Cu@g-C<sub>3</sub>N<sub>4</sub>@Zn symmetric cells after 0, 30, and 50 cycles at 1 mA cm<sup>-2</sup>/1 mAh cm<sup>-2</sup>.

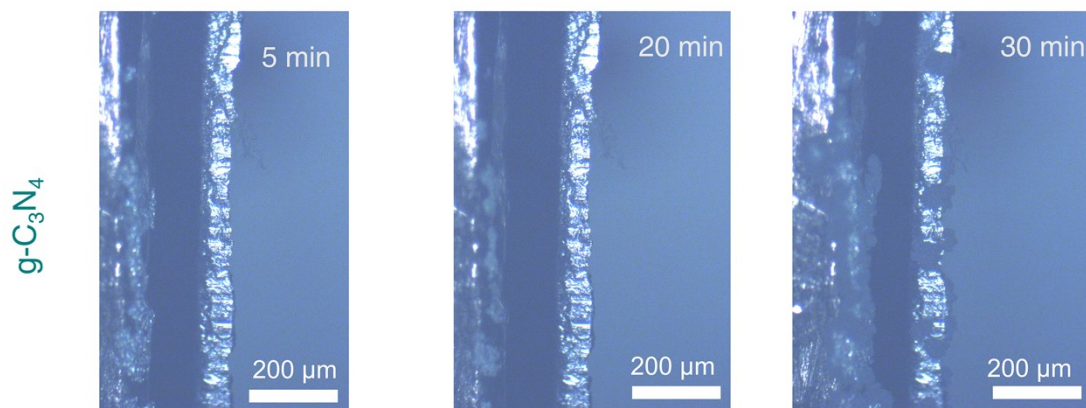

**Fig. S15** In-situ optical microscopy images of Zn deposition on  $g\text{-C}_3\text{N}_4@\text{Zn}$  after 5, 20, and 30 min of plating. Scale bars:  $200\ \mu\text{m}$ .

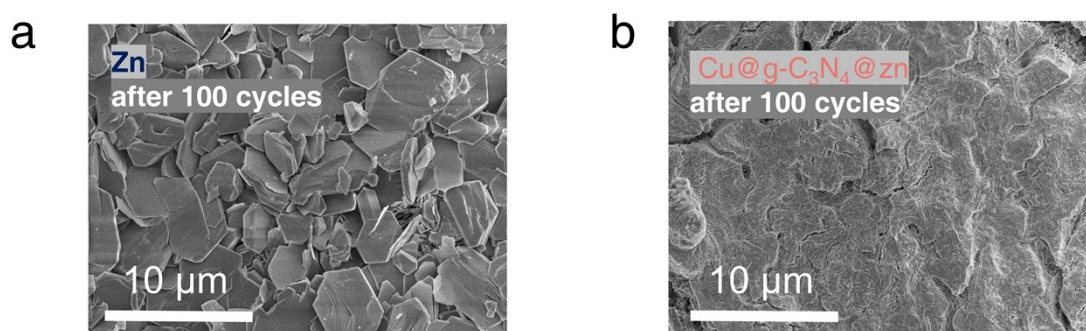

**Fig. S16** Post-cycling SEM images of (a) bare Zn and (b)  $\text{Cu}@g\text{-C}_3\text{N}_4@\text{Zn}$  anodes after 100 cycles at  $1\ \text{mA cm}^{-2}/1\ \text{mAh cm}^{-2}$ . Scale bars:  $10\ \mu\text{m}$ .

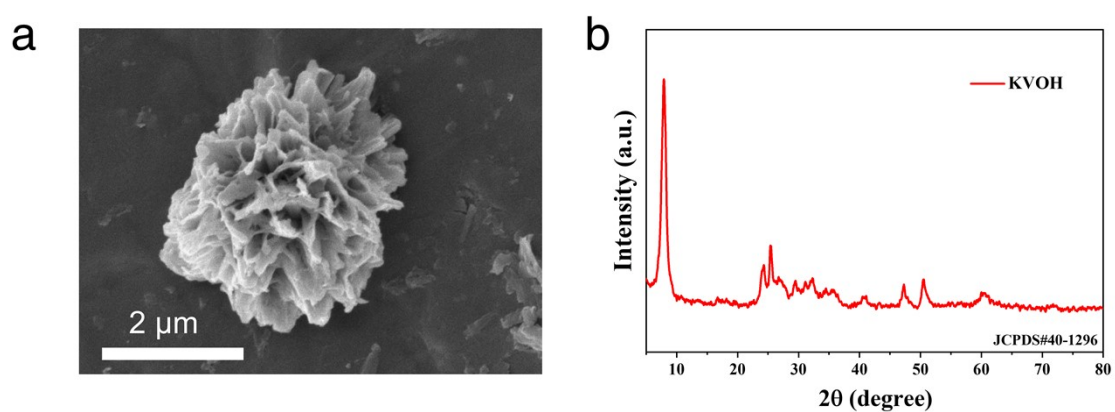

**Fig. S17** (a) SEM image and (b) XRD pattern of the KVOH cathode material.

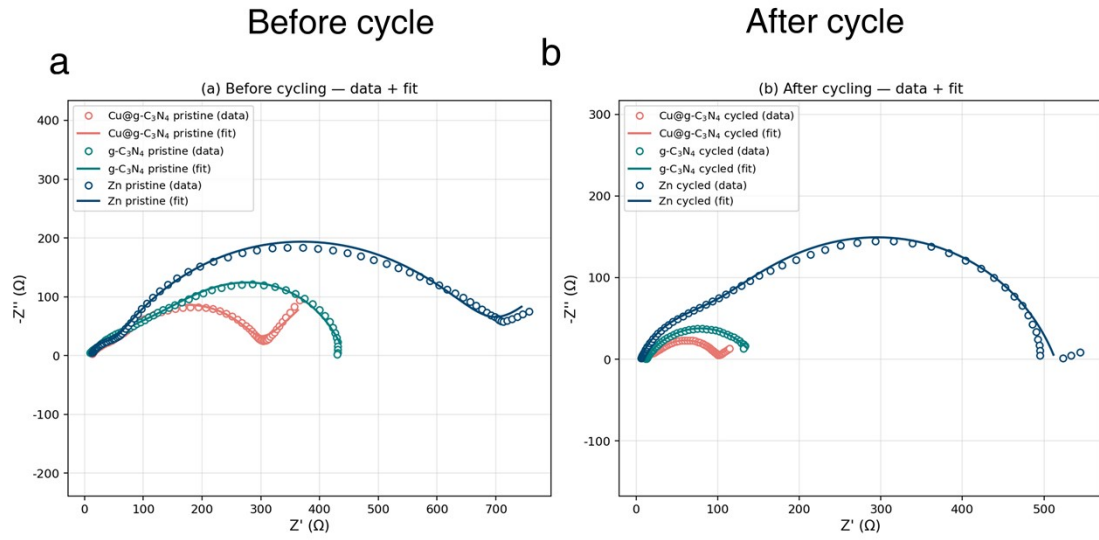

**Fig. S18** EIS Nyquist plots and equivalent circuit fitting results of Zn//KVOH full cells (a) before cycling and (b) after cycling.

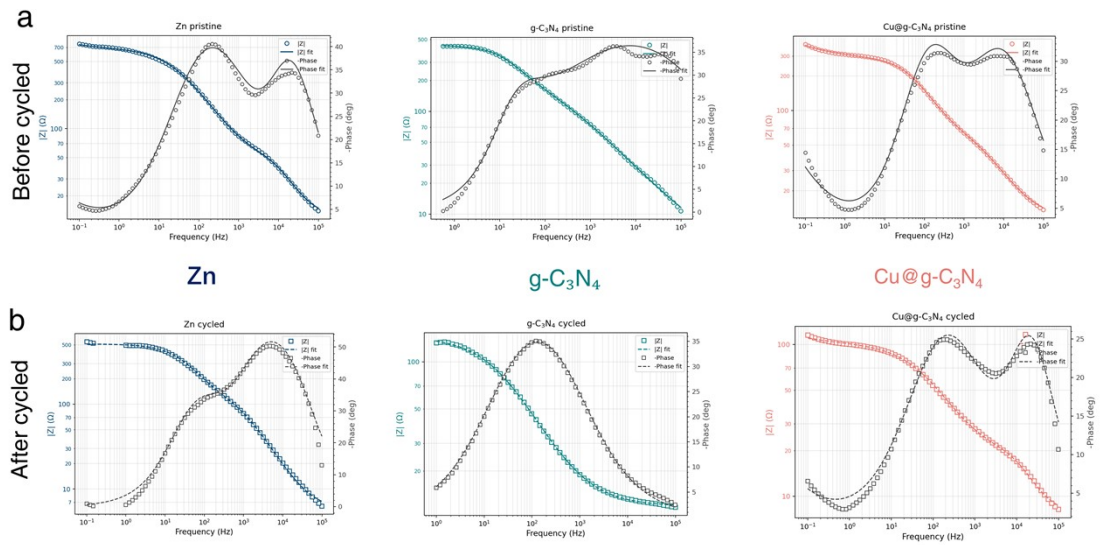

**Fig. S19** Bode plots of Zn//KVOH full cells using bare Zn, g-C<sub>3</sub>N<sub>4</sub>@Zn, and Cu@g-C<sub>3</sub>N<sub>4</sub>@Zn anodes (a) before and (b) after cycling.

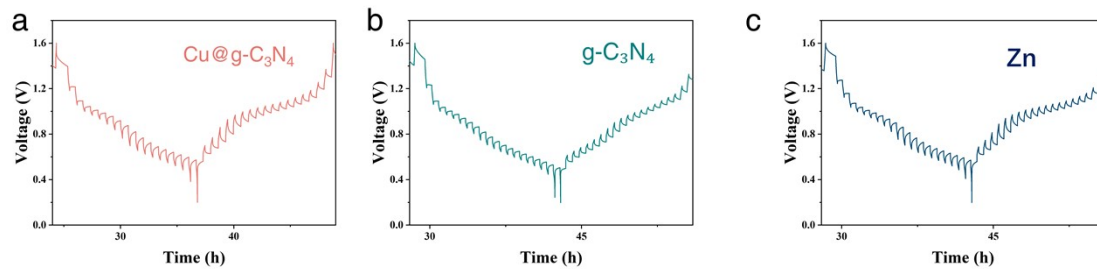

**Fig. S20** GITT profiles of Zn/KVOH full cells using (a) Cu@g-C<sub>3</sub>N<sub>4</sub>@Zn, (b) g-C<sub>3</sub>N<sub>4</sub>@Zn, and (c) bare Zn anodes.

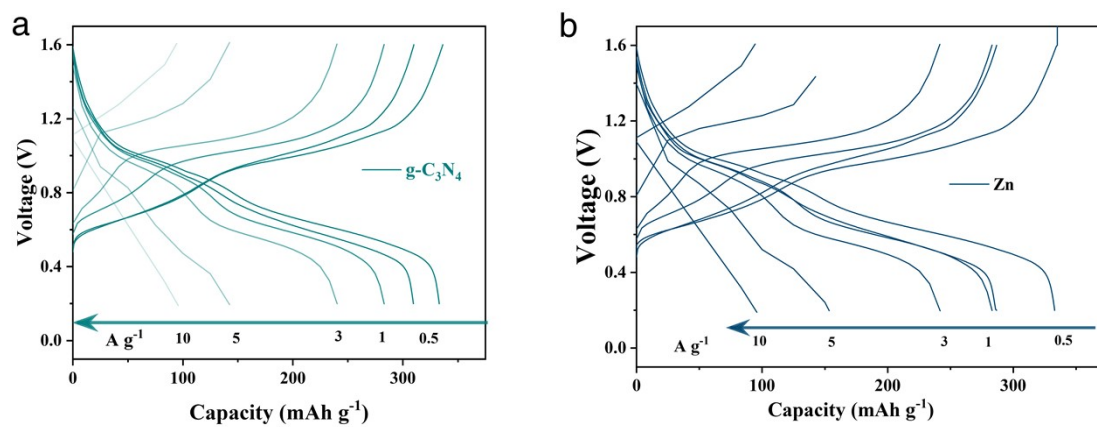

**Fig. S21** Charge-discharge profiles of Zn/KVOH full cells using (a) g-C<sub>3</sub>N<sub>4</sub>@Zn and (b) bare Zn anodes at different current densities.

**Table S1** Mass yield of Cu@g-C<sub>3</sub>N<sub>4</sub> from thermal polymerization.

| Weight of powder plus crucible(g) | Weight of the powder after heating the crucible(g) | Mass of empty crucible(g) | Mass of Cu@g-C <sub>3</sub> N <sub>4</sub> produced(g) |
|-----------------------------------|----------------------------------------------------|---------------------------|--------------------------------------------------------|
| 40.9797                           | 40.5042                                            | 40.4705                   | 0.0337                                                 |

**Table S2** ICP-OES results for Cu content determination in Cu@g-C<sub>3</sub>N<sub>4</sub>.

| Sample Number                      | Constant volume V <sub>o</sub> (mL) | Element | Test solution element concentration C <sub>0</sub> (mg/L) | Sample element content W (%) |
|------------------------------------|-------------------------------------|---------|-----------------------------------------------------------|------------------------------|
| Cu@g-C <sub>3</sub> N <sub>4</sub> | 1000                                | Cu      | 6.32                                                      | 4.23%                        |

**Table S3** Equivalent-circuit fitting parameters obtained from EIS analysis of Zn//KVOH full cells before and after cycling.

| Sample                                          | $R_s = R_0$<br>( $\Omega$ ) | $R_f = R_1$<br>( $\Omega$ ) | $R_{ct} = R_2$<br>( $\Omega$ ) | $W \sigma$ ( $\Omega \cdot s^{-0.5}$ ) |
|-------------------------------------------------|-----------------------------|-----------------------------|--------------------------------|----------------------------------------|
| Zn before cycle                                 | $11.78 \pm 0.20$            | $29.4 \pm 1.3$              | $638.6 \pm 6.1$                | $56.2 \pm 5.0$                         |
| Zn cycled                                       | $5.63 \pm 0.13$             | $88.9 \pm 9.8$              | $419.3 \pm 16.1$               |                                        |
| g-C <sub>3</sub> N <sub>4</sub> before cycle    | $3.60 \pm 0.29$             | $222.5 \pm 25.1$            | $221.5 \pm 25.0$               |                                        |
| g-C <sub>3</sub> N <sub>4</sub> cycled          | $11.53 \pm 0.06$            | $133.2 \pm 0.8$             | $0.5 \pm 0.1$                  |                                        |
| Cu@g-C <sub>3</sub> N <sub>4</sub> before cycle | $11.16 \pm 0.19$            | $46.7 \pm 2.5$              | $230.3 \pm 3.4$                | $59.9 \pm 1.7$                         |
| Cu@g-C <sub>3</sub> N <sub>4</sub> cycled       | $7.53 \pm 0.10$             | $83.5 \pm 0.9$              | $10.4 \pm 0.5$                 | $7.6 \pm 0.6$                          |

## Reference

- 1 P. E. Blöchl, Projector augmented-wave method. *Phys. Rev. B*, 1994, **50**, 17953-17979.
- 2 J. P. Perdew, K. Burke, M. Ernzerhof, *Phys. Rev. Lett.*, 1996, **77**, 3865-3868.
- 3 S. Grimme, J. Antony, S. Ehrlich, H. Krieg, *J. Chem. Phys.*, 2010, **132** (15), 154104.
